# Supplementary material
Source: MDPI journal article supplement (https://www.mdpi.com/2227-9040/9/1/17)
Supplement: s1 [file s1]

# Preparation and Characterization of Au/NiPc/Anti-P53/Bsa Electrode for Application as a P53 Antigen Sensor

Yen-Jou Chen<sup>1</sup>, Yu-Ren Peng<sup>1</sup>, Hung-Yu Lin<sup>1</sup>, Tsung-Yu Hsueh<sup>1</sup>, Chao-Sung Lai<sup>2,3\*</sup> and Mu-Yi Hua<sup>1\*</sup>

## Supplementary Materials

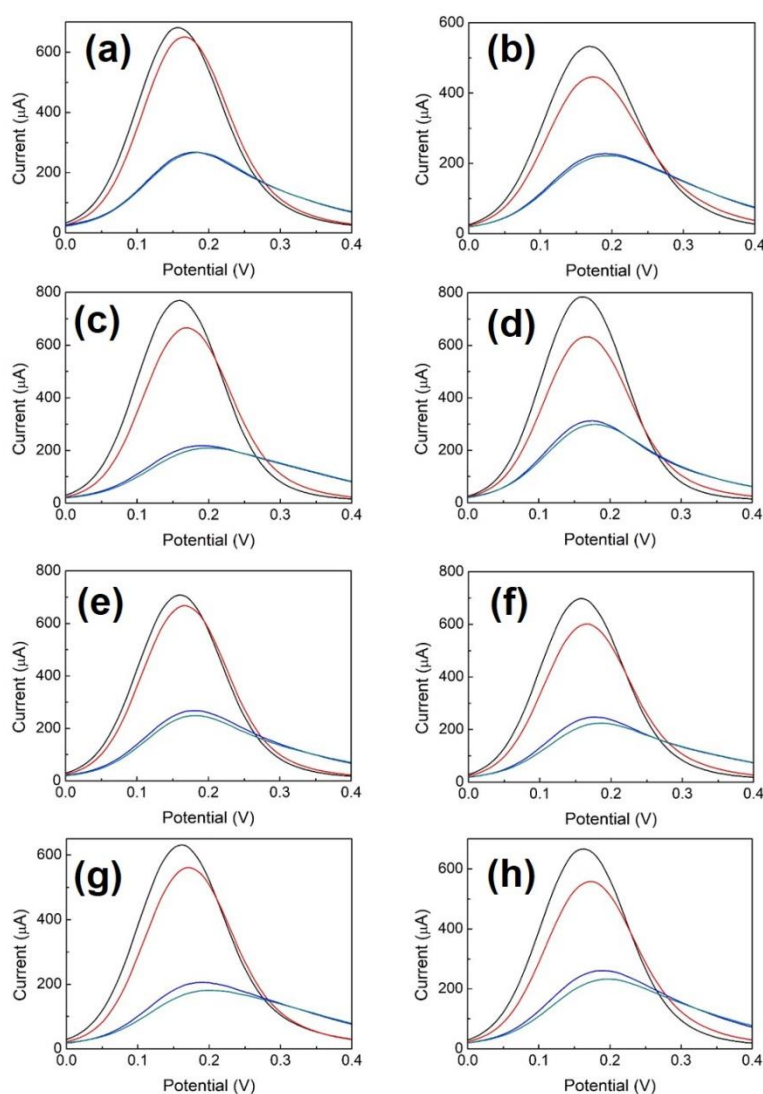

**Figure S1.** DPV analysis of different p53 antigen concentrations as detected by Au/NiPc/anti-p53/BSA electrodes. The black, red, blue and green curves represent  $5 \times 10^{-3}$  wt% NiPc, 1 ng/mL anti-p53, 136  $\mu\text{g/mL}$  BSA, and (a) 0.1, (b) 0.32, (c) 1, (d) 3.2, (e) 10, (f) 32, (g) 50, and (h) 100 pg/mL of p53 antigen, respectively.

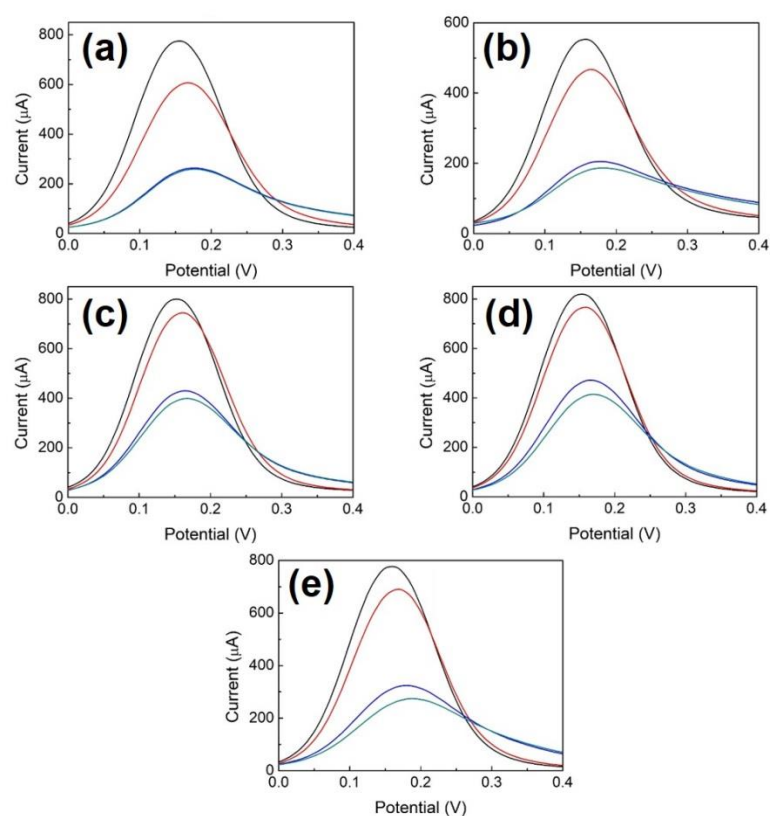

**Figure S2.** DPV analysis of different p53 antigen concentrations as detected by Au/NiPc/anti-p53/BSA electrodes. The black, red, blue and green curves represent 5×10<sup>-3</sup> wt% NiPc, 100 ng/mL anti-p53, 136 μg/mL BSA and (a) 0.1, (b) 1, (c) 10, (d) 100, and (e) 500 pg/mL of p53 antigen, respectively.
